# Supplementary material for: Facile preparation of Co/C catalysts encapsulated in carbon and selective hydrogenation in nitroaromatic hydrocarbons
Source: Royal Society of Chemistry journal article supplement (doi:10.1039/d4nj00858h), 2024-01-01
Supplement: d4nj00858h1.pdf [file d4nj00858h1.pdf]

## Facile preparation of Co/C catalysts encapsulated in carbon and selective hydrogenation in nitroaromatic hydrocarbons

**Fig. S1** FT-IR spectra of Co-BTC and 1,3,5-H<sub>3</sub>BTC.

**Fig. S2** XRD spectra of Co-BTC

**Fig. S3** SEM images of Co-BTC frameworks

**Fig. S4** Co/C-500 Particle Size Distribution Map

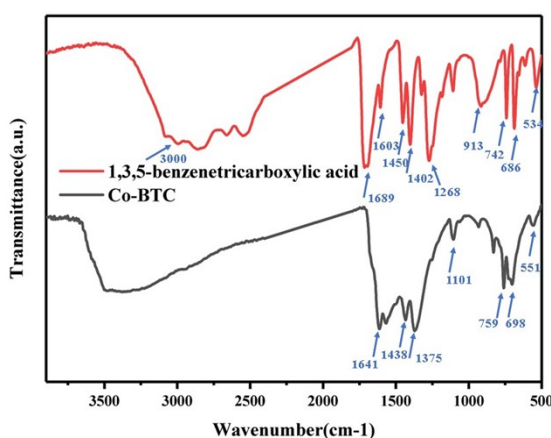

**Fig. S1** FT-IR spectra of Co-BTC and 1,3,5-H<sub>3</sub>BTC.

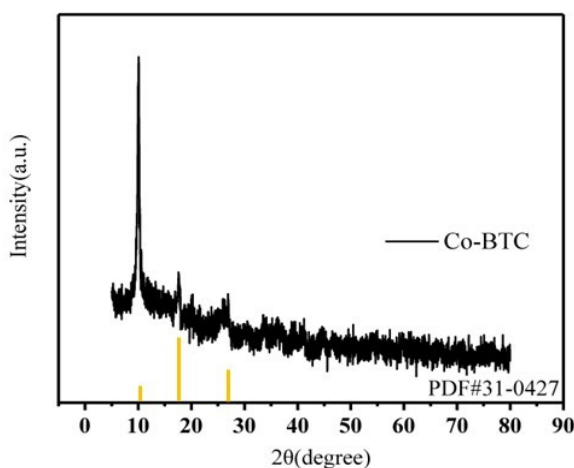

**Fig. S2** XRD spectra of Co-BTC

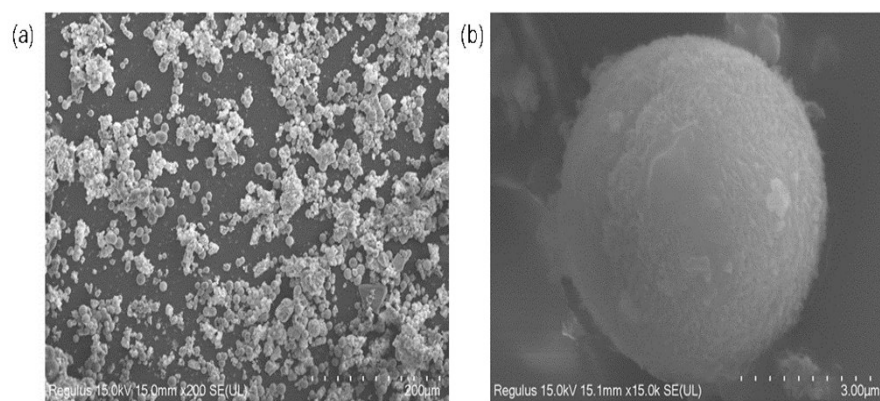

**Fig S3.**SEM images of Co-BTC frameworks

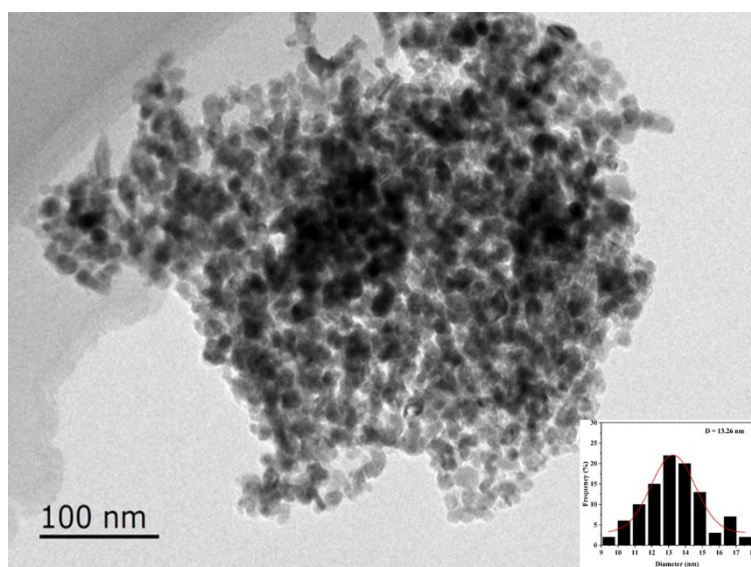

**Fig.S4** Co/C-500 Particle Size Distribution Map
